# Supplementary material for: The Peroxisome Proliferator-Activated Receptor α is dispensable for cold-induced adipose tissue browning in mice
Source: PubMed Central journal article supplement — Mol Metab. 2018 Feb 9;10:39–54. doi: 10.1016/j.molmet.2018.01.023 (PMC5985232; doi:10.1016/j.molmet.2018.01.023), 2018-02-09
Supplement: mmc1.pdf [file mmc1.pdf]

## Supplemental Data

### **The Peroxisome Proliferator-Activated Receptor $\alpha$ is dispensable for cold-induced adipose tissue browning in mice**

Merel Defour<sup>1</sup>, Wieneke Dijk<sup>1</sup>, Philip Ruppert<sup>1</sup>, Emmani B.M. Nascimento<sup>2</sup>, Patrick Schrauwen<sup>2</sup>, Sander Kersten<sup>1</sup>

<sup>1</sup>Nutrition, Metabolism and Genomics Group, Division of Human Nutrition and Health, Wageningen University, Stippeneng 4, 6708 WE Wageningen, The Netherlands; <sup>2</sup>Department of Human Biology and Human Movement Sciences, NUTRIM School for Nutrition and Translational Research in Metabolism, Maastricht University Medical Center, PO Box 616, 6200 MD Maastricht, The Netherlands

Supplemental table 1. List of primers used.

|                 |                         |                         |
|-----------------|-------------------------|-------------------------|
| <i>Pparg</i>    | CACAATGCCATCAGGTTTGG    | GCTGGTCGATATCACTGGAGATC |
| <i>Fabp4</i>    | AAGAAGTGGGAGTGGGCTTT    | AATCCCCATTTACGCTGATG    |
| <i>36B4</i>     | ATGGGTACAAGCGCGTCCTG    | GCCTTGACCTTTTCAGTAAG    |
| <i>Elovl3</i>   | TTCTCACGCGGGTTAAAAATGG  | GAGCAACAGATAGACGACCAC   |
| <i>Adtrp</i>    | TGTGGCGCTACGTTTCAGAC    | CCGGCGACTAGGATGTAAGC    |
| <i>Slc2a4</i>   | GGAAGGAAAAGGGCTATGCTG   | TGAGGAACCGTCCAAGAATGA   |
| <i>Ucp1</i>     | CCTGCCTCTCTCGGAAACAA    | TGTAGGCTGCCCAATGAACA    |
| <i>Cidea</i>    | TGACATTCATGGGATTGCAGAC  | GGCCAGTTGTGATGACTAAGAC  |
| <i>Ppargca1</i> | AGACGGATTGCCCTCATTTGA   | TGTAGCTGAGCTGAGTGTTGG   |
| <i>G0s2</i>     | AGTGCTGCCTCTCTTCCCAC    | TTCCATCTGAGCTCTGGGC     |
| <i>Gpd1</i>     | CTCGCCATCGCCCTCACTG     | ACCGCTCACTCGCTCTTTGC    |
| <i>Ppara</i>    | TATTCGGCTGAAGCTGGTGTAC  | CTGGCATTGTGTTCCGGTTCT   |
| <i>Ehhadh</i>   | AAAGCTAGTTTGGACCATACGG  | ATGTAAGGCCAGTGGGAGATT   |
| <i>Hmgcs2</i>   | TTCTTGCGGTAGGCTGCATAG   | TGGTGGATGGGAAGCTGTCTA   |
| <i>Acadvl</i>   | CACTCAGGCAGTTCTGGACA    | TCCCAGGGTAACGCTAACAC    |
| <i>Vnn1</i>     | CTTTCCTCGCGGCTGTTTAC    | CCTCCAGGTATGGGTAGATCGT  |
| <i>Cpt1a</i>    | CTCAGTGGGAGCGACTCTTCA   | GGCCTCTGTGGTACACGACAA   |
| <i>Cpt1b</i>    | GAGCCAGATTCCTGCACCATTG  | CCCTGCTGGGTCCTTCCAAG    |
| <i>Slc25a20</i> | CCGAAACCCATCAGTCCGTTTAA | ACATAGGTGGCTGTCCAGACAA  |
| <i>Slc22a5</i>  | TTGGAGACGAAGGACGGACG    | GCTCAGAGAAGTTGGCGATGG   |
| <i>Fabp1</i>    | ATGAACTTCTCCGGCAAGTACC  | CTGACACCCCCTTGATGTCC    |
| <i>Cd36</i>     | AGATGACGTGGCAAAGAACAG   | CCTTGGCTAGATAACGAACTCTG |
| <i>PKD4</i>     | TGGAGCATTTCTCGCGCTAC    | ACAGGCAATTCTTGTCGCAAA   |
| <i>ACADVL</i>   | GTCTGGTGGTCTCTACCGC     | CACGGGTCCCAAGAAGTACTGAT |
| <i>ADIPOQ</i>   | TATCCCCAACATGCCCATTCG   | TGGTAGGCAAAGTAGTACAGCC  |
| <i>UCPI</i>     | AGGATCGGCCTCTACGACAC    | GCCCAATGAATACTGCCACTC   |

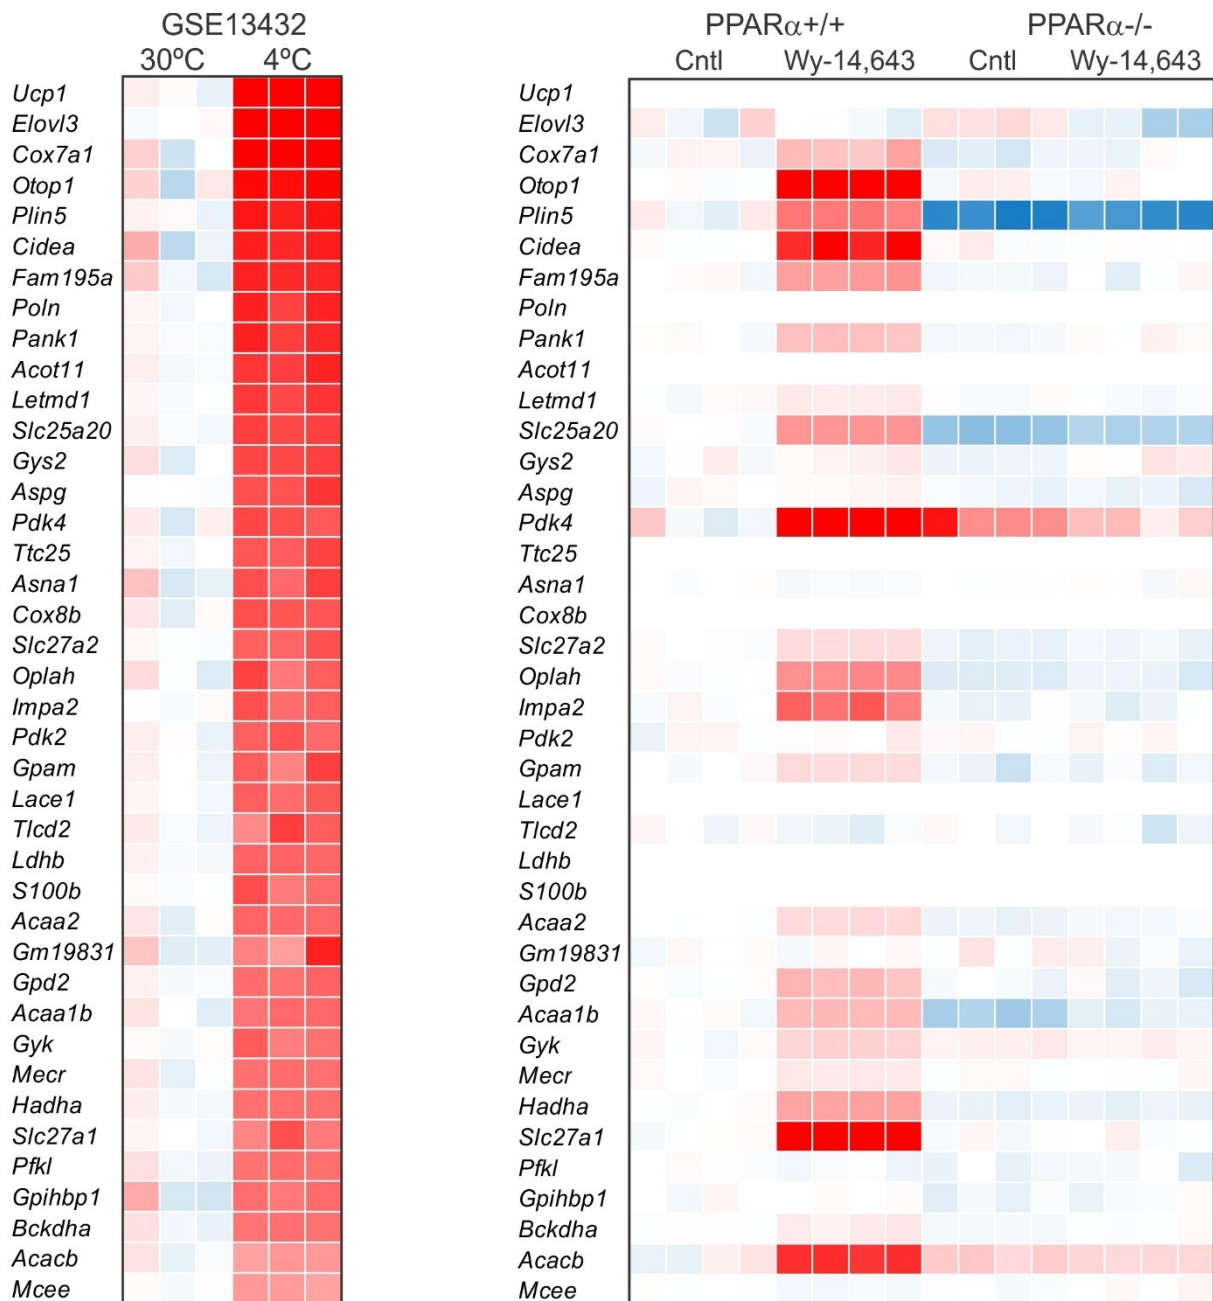

Supplemental figure 1. PPAR $\alpha$  is highly upregulated during cold-induced browning. (A) Heatmap of the top 40 most highly induced genes in subcutaneous adipose tissue of mice after 7 days at 4°C as compared to 7 days at 30°C (GSE13432). In parallel, the expression profiles are shown of the same genes in livers of wild type and PPAR $\alpha$ -/- mice treated with Wy-14.643 for 5 days (GSE8295).

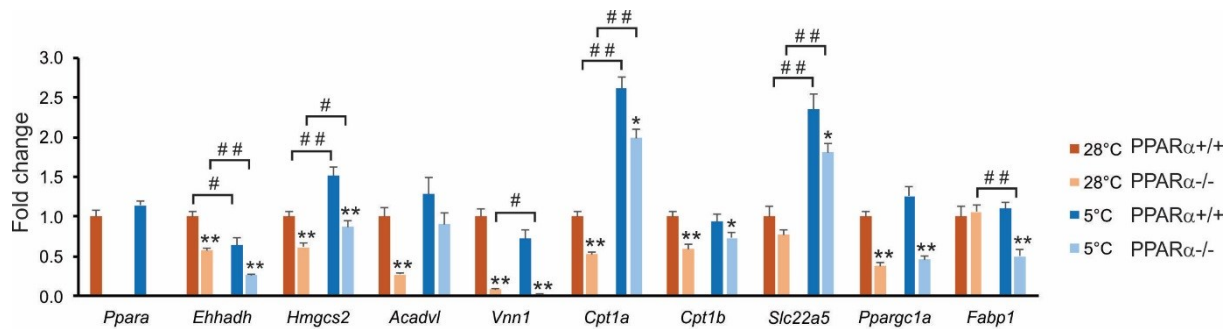

Supplemental figure 2. Effect of PPAR $\alpha$  ablation on hepatic gene expression during acute cold. Hepatic expression of selected genes in wildtype and PPAR $\alpha$ -/- mice exposed to cold (5°C) or thermoneutrality (28°C) for 24h. Both groups of mice were housed at thermoneutrality (28°C) for 5 weeks prior to the intervention. Error bars represent SEM. Asterisk indicates significantly different from wildtype mice under the same conditions according to Student's t-test (\*P<0.05, \*\*P<0.001). Pound sign indicates significant difference between cold and thermoneutral mice according to Student's t-test (#P<0.05, ##P<0.001).
